# Supplementary material for: FXR and AHR mediate aristolochic acid-induced liver injury: mode of action from the nuclear receptors' point of view
Source: Research Square preprint supplement (doi:10.21203/rs.3.rs-3387583/v1), 2023-10-28
Supplement: Supplementary file 1 [file 9c8feae4245ee4e214e6d33b.docx]

**Table S1. Sequences of primers and oligonucleotides in this study.**

| Oligonucleotide | Sequences | Application |
| --- | --- | --- |
| Lxr-F | CTGATTCTCCGTGTCCTCTGTG | RT-qPCR |
| Lxr-R | CACCCTACCCTTTGACTCTCT | RT-qPCR |
| Fxr-F | ACATTCAACCATCACCACGCTGAG | RT-qPCR |
| Fxr-R | TGCTGCTCTGAGGAGGACAAGG | RT-qPCR |
| Ahr-F | CGCAACTCAGAGACCGCTAACG | RT-qPCR |
| Ahr-R | ATGGGAGAGAAAGGGCTGGAGATC | RT-qPCR |
| Nrf2-F | GCCCACATTCCCAAACAAGAT | RT-qPCR |
| Nrf2-R | CCAGAGAGCTATTGAGGGACTG | RT-qPCR |
| Gapdh-F | CCATTCTTCCACCTTTGATGCT | RT-qPCR |
| Gapdh-R | TGTTGCTGTAGCCATATTCATTGT | RT-qPCR |
| AHR-F | GTCGTCTAAGGTGTCTGCTGGA | RT-qPCR |
| AHR-R | CGCAAACAAAGCCAACTGAGGTG | RT-qPCR |
| NRF2-F | CACATCCAGTCAGAAACCAGTGG | RT-qPCR |
| NRF2-R | GGAATGTCTGCGCCAAAAGCTG | RT-qPCR |
| FXR-F | ACTTCCGTCTGGGCATTCTGAC | RT-qPCR |
| FXR-R | GCTGTAAGCAGAGCATACTCCTC | RT-qPCR |
| SHP-F | TGCCTGAAAGGGACCATCCTCT | RT-qPCR |
| SHP-R | GTTCCAGGACTTCACACAGCAC | RT-qPCR |
| hSREBP1-F | CTGGTCTACCATAAGCTGCAC | RT-qPCR |
| hSREBP1-R | GACTGGTCTTCACTCTCAATG | RT-qPCR |
| hFASN-F | CCATCTACAACATCGACACCA | RT-qPCR |
| hFASN-R | CTTCCACACTATGCTCAGGTAG | RT-qPCR |
| SCD1-F | CAGGTCAACCTATTGGTCAAGCC | RT-qPCR |
| SCD1-R | GCCTTCTCATCACCAATGGTCC | RT-qPCR |
| FAS-F | CAGGTCAACCTATTGGTCAAGCC | RT-qPCR |
| FAS-R | GCCTTCTCATCACCAATGGTCC | RT-qPCR |
| CYP1A1-F | GATTGAGCACTGTCAGGAGAAGC | RT-qPCR |
| CYP1A1-R | ATGAGGCTCCAGGAGATAGCAG | RT-qPCR |
| CYP1A2-F | GCCTTCATCCTGGAGACCTT | RT-qPCR |
| CYP1A2-R | AGCGTTGTGTCCCTTGTTG | RT-qPCR |
| NQO1-F | CCTGCCATTCTGAAAGGCTGGT | RT-qPCR |
| NQO1-R | GTGGTGATGGAAAGCACTGCCT | RT-qPCR |
| BAX-F | TCAGGATGCGTCCACCAAGAAG | RT-qPCR |
| BAX-R | TGTGTCCACGGCGGCAATCATC | RT-qPCR |
| GSTP-F | TGGACATGGTGAATGACGGCGT | RT-qPCR |
| GSTP-R | GGTCTCAAAAGGCTTCAGTTGCC | RT-qPCR |
| CAT-F | GTGCGGAGATTCAACACTGCCA | RT-qPCR |
| CAT-R | CGGCAATGTTCTCACACAGACG | RT-qPCR |
| SOD1-F | CTCACTCTCAGGAGACCATTGC | RT-qPCR |
| SOD1-R | CCACAAGCCAAACGACTTCCAG | RT-qPCR |
| miR-122-F | AACACGCTGGAGTGTGACAA | RT-qPCR |
| miR-122-R | CAGTGCAGGGTCCGAGGT | RT-qPCR |
| GAPDH-F | GTCTCCTCTGACTTCAACAGCG | RT-qPCR |
| GAPDH-R | ACCACCCTGTTGCTGTAGCCAA | RT-qPCR |
